# Supplementary material for: Influence of Cross-Linking Conditions on Drying Kinetics of Alginate Hydrogel
Source: MDPI journal article supplement (doi:10.3390/gels9010063), 2023-01-12
Supplement: s1 [file s1]

## Supplementary Materials

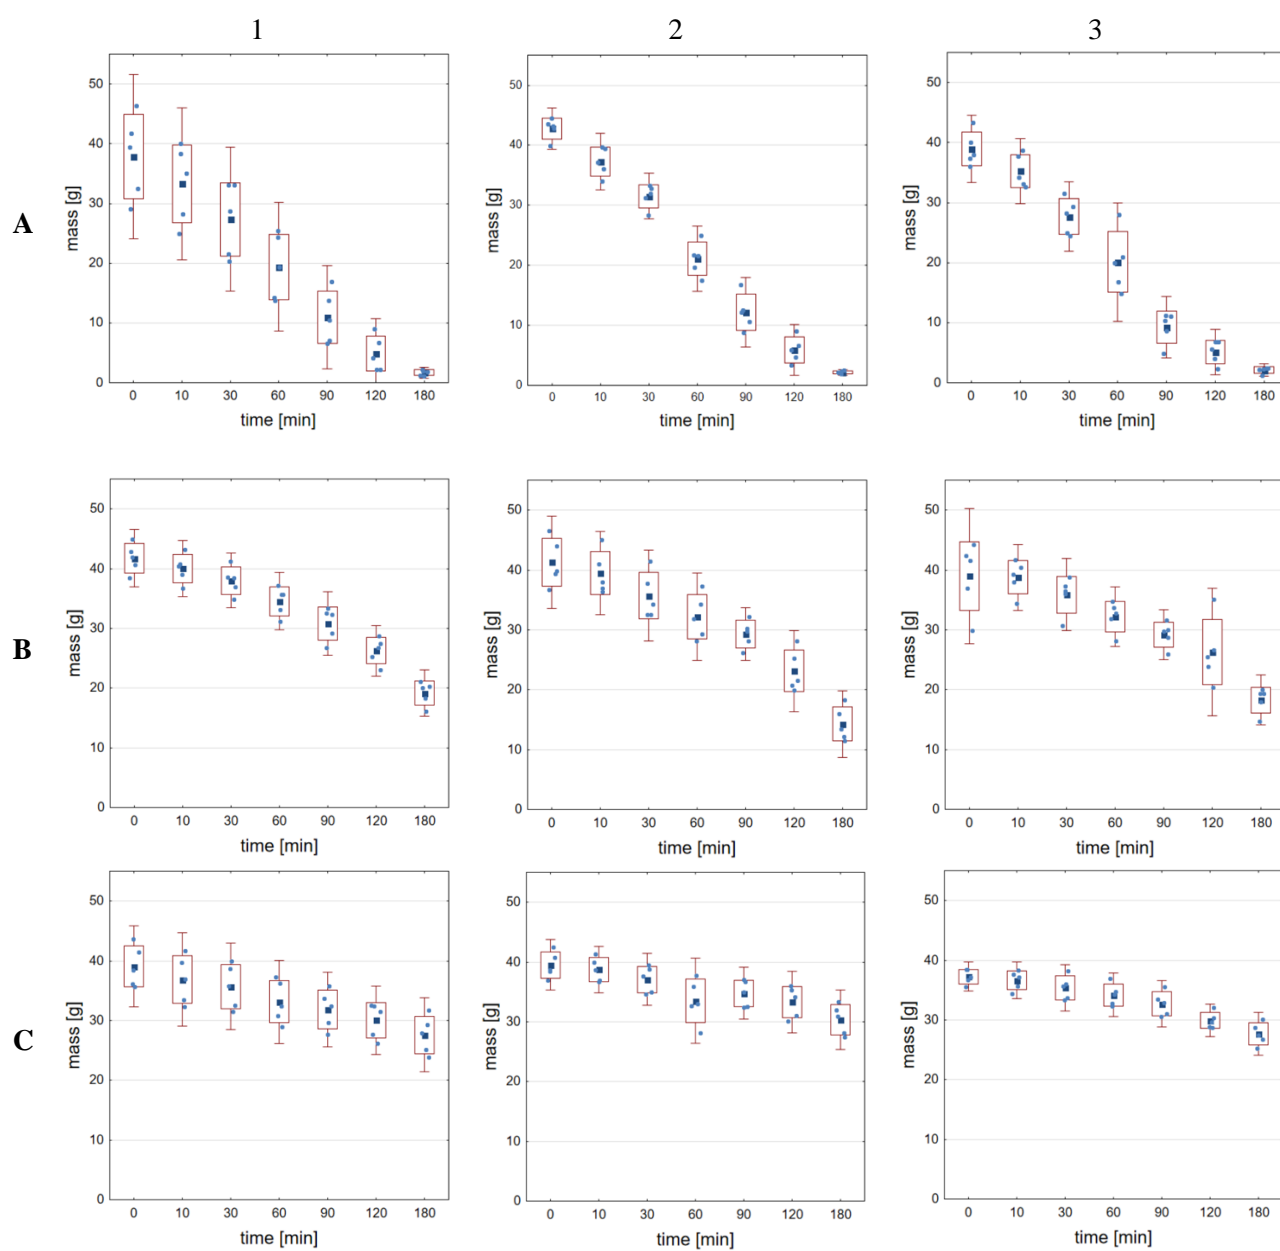

**Figure S1.** Mass changes during different type of drying process of alginate hydrogel ((A)–23°C, 45% humidity, (B)–7°C, 50% humidity, (C)–7°C, 95% humidity) for 0.1 M of CaCl<sub>2</sub> concentration in dependence on cross-linking time (1–10 min, 2–20 min and 3–40 min).

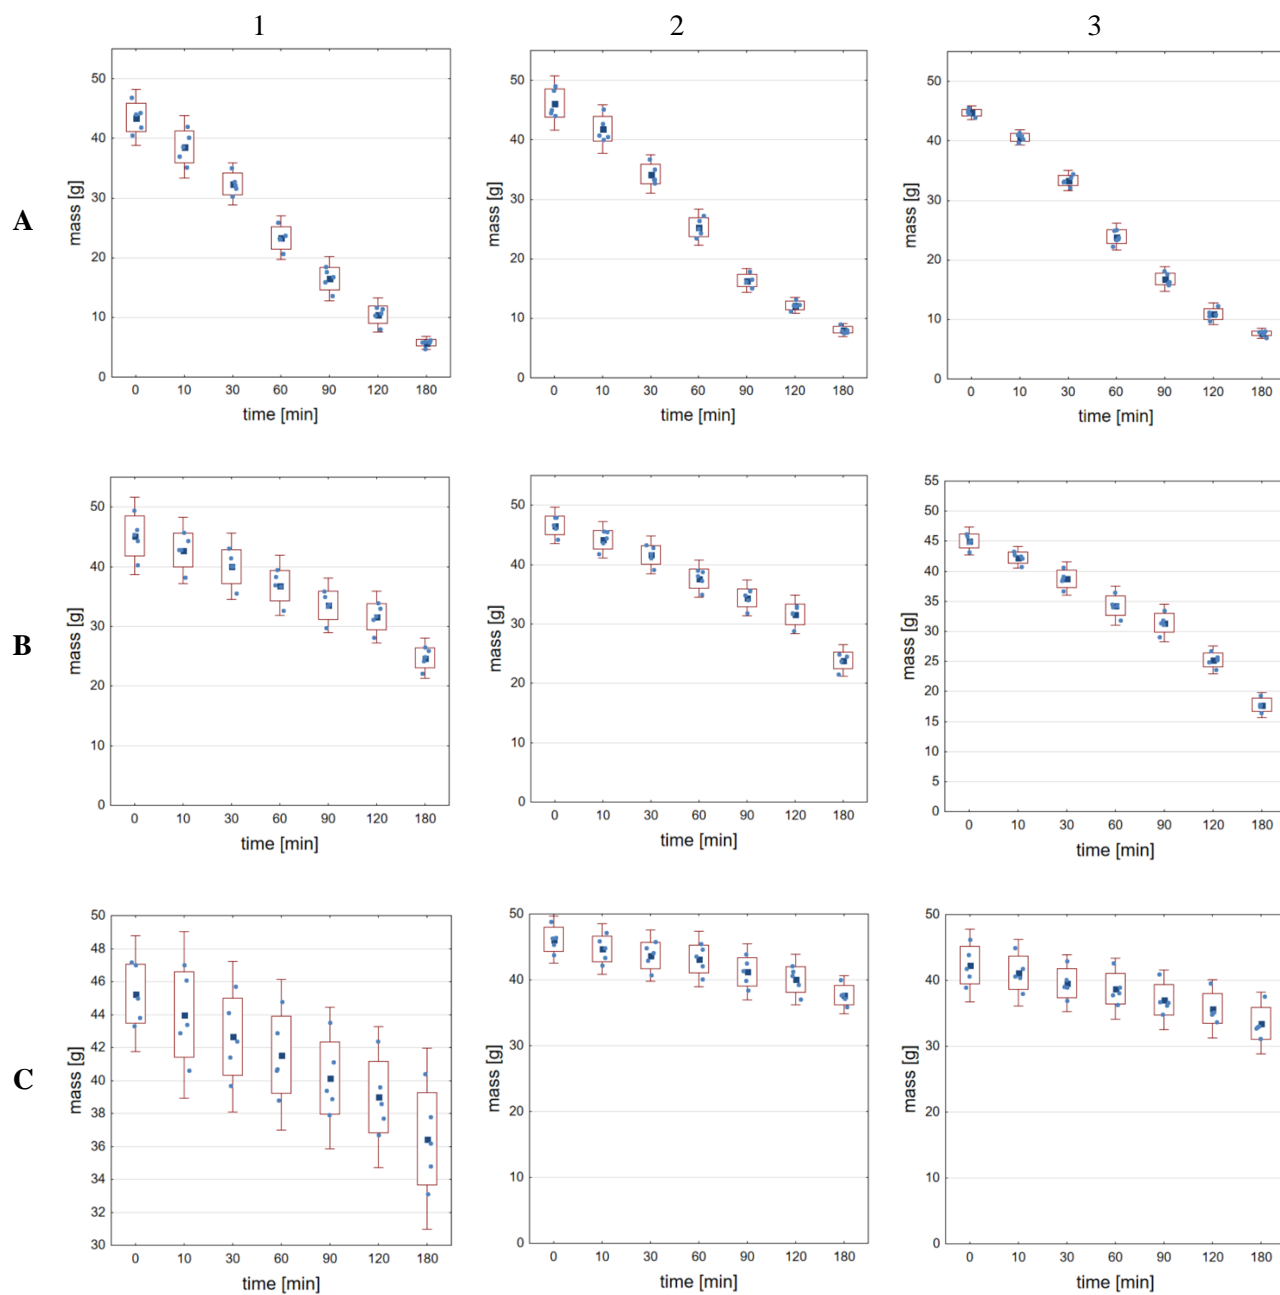

**Figure S2.** Mass changes during different type of drying process of alginate hydrogel ((A)–23°C, 45% humidity, (B)–7°C, 50% humidity, (C)–7°C, 95% humidity) for 0.5 M of  $\text{CaCl}_2$  concentration in dependence on cross-linking time (1–10 min, 2–20 min and 3–40 min)

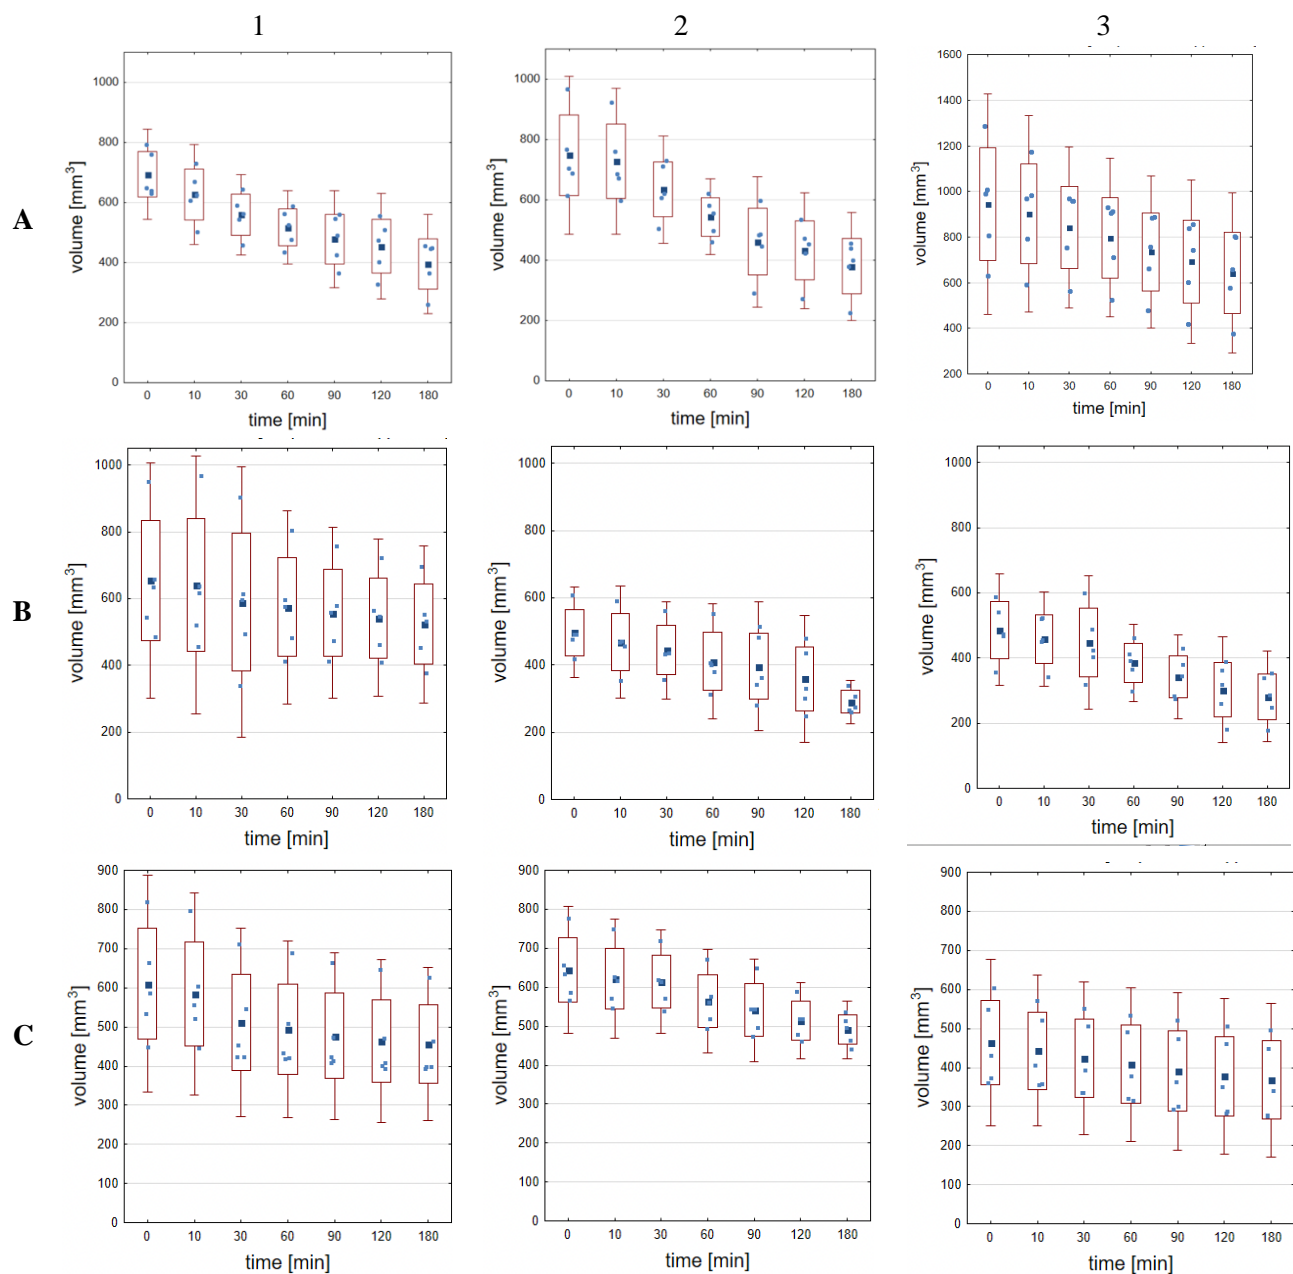

**Figure S3.** Dimensions changes during different type of drying process of alginate hydrogel ((A)–23°C, 45% humidity, (B)–7°C, 50% humidity, (C)–7°C, 95% humidity) for 0.1 M of  $\text{CaCl}_2$  concentration in dependence on cross-linking time (1–10 min, 2–20 min and 3–40 min)

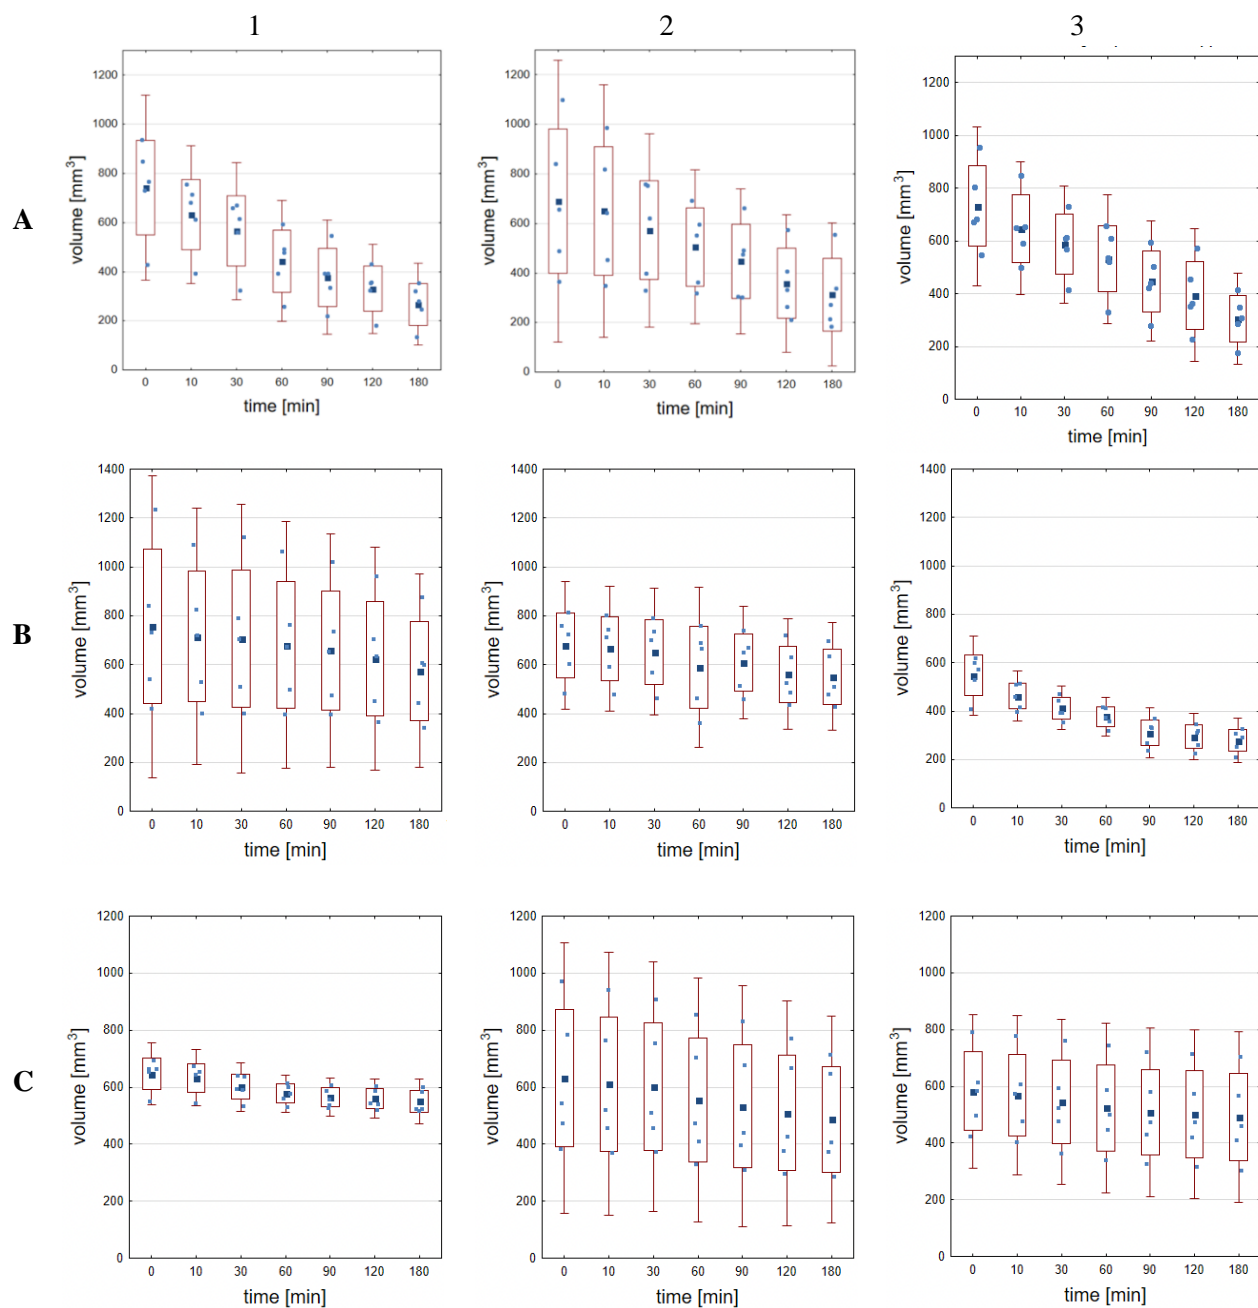

**Figure S4.** Dimensions changes during different type of drying process of alginate hydrogel ((A)– $23^\circ\text{C}$ , 45% humidity, (B)– $7^\circ\text{C}$ , 50% humidity, (C)– $7^\circ\text{C}$ , 95% humidity) for 0.5 M of  $\text{CaCl}_2$  concentration in dependence on cross-linking time (1–10 min, 2–20 min and 3–40 min).
